# Supplementary material for: Alterations of STEP46 and STEP61 Expression in the Rat Retina with Age and AMD-Like Retinopathy Development
Source: MDPI journal article supplement (doi:10.3390/ijms21155182), 2020-07-22

**Supplementary Figure S1.** Western blot analysis effects of the STEP inhibitor (TC-2153) on STEP protein level in retina.

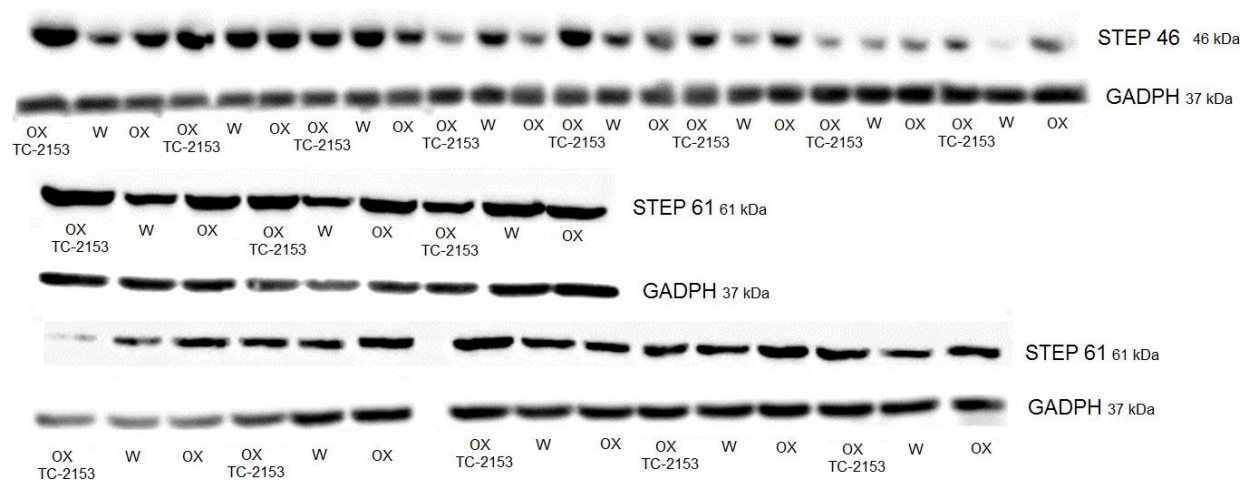

Supplement: s1 [file s1]
